# Temporary Dental Restorative Materials for Military Field Use

COL Steven O. Hondrum, DC USA

New temporary dental restorative materials are an important military requirement. This study compares the critical properties of the currently used temporary material, reinforced zinc oxide-eugenol (ZOE), with those of a glass ionomer restorative material (GI), a high-viscosity modified glass ionomer material (MGI), and two resin-modified glass ionomer materials (RM-GIs). Properties tested included compressive and tensile strength, rigidity, hardness, bond strength, working and setting times, and storage stability. Ranked results for compressive strength, rigidity, and hardness were MGI > GI > RMGI > ZOE; for tensile strength they were RMGI > MGI > GI > ZOE; and for storage stability they were ZOE > MGI > GI > RMGI. Working and setting times were all within reasonable clinical limits, and bond strength was heavily dependent on tooth surface preparation. Although none of the materials tested met all of the ideal requirements, the high-viscosity glass ionomer material offers the most promise for military field use.

## Introduction

Dental emergencies, most often attributable to caries, are a significant problem during combat and field exercises and may be the cause of substantial lost duty time.<sup>1-3</sup> Temporary dental restorative materials used at present to treat such emergencies have disadvantages that may preclude their efficacious use and optimal longevity in the military field situation; new temporary dental restorative materials for field use are an important military requirement.<sup>4</sup> Table I lists the ideal biological, physical, mechanical, and chemical properties of temporary dental restorative materials. In addition, the materials should be inexpensive, easily obtained, and handle well under all environmental conditions. Temporary materials would be used primarily at the level of the dental aid bag,<sup>5</sup> but they could be used at every level of care.

The traditional temporary dental restorative material for military field use is a polymer-reinforced zinc oxide and eugenol material (ZOE).<sup>6,7</sup> The mechanical properties of reinforced ZOE are sufficient for short-term success, and the material is anti-inflammatory (inhibits prostaglandin synthesis), obtundent (inhibits sensory nerve activity),<sup>8</sup> and antibacterial.<sup>9</sup> Despite these benefits, ZOE solubility, thermal expansion, and shrinkage are high, and there is no bond to tooth structure.<sup>10-13</sup> Most importantly, hot, humid climates accelerate the setting reaction; this limits usefulness during certain military deployments.<sup>14</sup> Finally, eugenol may have detrimental effects on the dental pulp.<sup>15</sup>

Glass ionomer materials (GIs) offer advantages as temporary materials such as adhesion to tooth structure<sup>16</sup> and fluoride release.<sup>17</sup> However, glass ionomer materials set slowly, exhibit poor early mechanical properties, and are initially susceptible to moisture contamination or desiccation.<sup>18</sup> A varnish or gloss is necessary to protect the material during the setting reaction.<sup>19</sup>

This varnish, as well as conditioners and primers necessary for optimal bond strength, may not always be available or practical in the military field situation. Finally, the GI liquid may become viscous over time or exposure to high temperatures, with consequential reduction in mechanical properties.<sup>20</sup>

Recently developed high-viscosity modified glass ionomer materials (MGIs) address the problems with traditional GIs mentioned above. The glass particles are treated with a surface agent to allow an increase in powder/liquid ratio, an improvement in cohesive strength, and to give the material a "packable" quality (R. Demke, personal communication). MGIs are reported to have an increased resistance to solubility, superior wear resistance compared with traditional GIs,<sup>21</sup> and yet retain bond strength.<sup>22</sup>

Resin-modified glass ionomer materials (RMGIs) are a further attempt to improve the immediate strength and resistance to desiccation and sorption properties of traditional GIs. These materials contain light-cured and/or self-cured polymerizable monomers to hasten the setting reaction. Resin polymerization allows rapid early development of strength and less susceptibility to moisture contamination, desiccation, and early solubility.<sup>23</sup> The traditional acid-base GI reaction should maintain the potential for adhesion and fluoride release.<sup>24</sup> The disadvantages of RMGIs compared with traditional GIs include a higher coefficient of thermal expansion,<sup>24</sup> and, although a bond to tooth structure is possible, a conditioner or primer may be needed to overcome polymerization shrinkage.

The purpose of the present research was to evaluate newly introduced high-viscosity modified glass ionomer materials and resin-modified glass ionomer materials for use as temporary dental restorative materials in the military field situation. Several critical mechanical and physical properties were measured and compared with those of a conventional glass ionomer material and the traditional temporary material, reinforced zinc oxide and eugenol.

## Materials and Methods

Table II lists materials; test methods are listed below. Light-curing was accomplished with a hand-held curing light (Prismatics, Caulk/Dentsply, Milford, Delaware) on each side of the test molds according to the manufacturer's directions. The RM-GIs were tested after both light-curing and self-curing to simulate those situations in which a light-curing unit may not be available in the field. Similarly, some specimens were tested after application of a varnish or gloss and some were tested without varnish or gloss in an attempt to simulate the field situation in which a varnish or gloss, especially if light-cured, may not be available to the provider.

Ultimate compressive strength (MPa) was determined according to American Dental Association specification number 96 for dental water-based cements, using cylindrical specimens (5.5 × 2.5 mm) and a universal testing machine (model 1011, Instron Corp., Canton, Massachusetts) at a crosshead speed of 1 mm per minute. Specimens were tested after setting for 1 hour in the

Commander, USA Area Dental Laboratory, Building 322 (MCDS-RG), ATTN: Dental Materials Laboratory/COL Hondrum, Fort Gordon, GA 30905-5661.

This manuscript was received for review in August 1997 and was accepted for publication in September 1997.

TABLE I  
OPTIMAL PROPERTIES OF A TEMPORARY DENTAL RESTORATIVE MATERIAL FOR MILITARY FIELD USE

|             |                                                                                                                                                               |
|-------------|---------------------------------------------------------------------------------------------------------------------------------------------------------------|
| Biological: | Compatible with vital tissue                                                                                                                                  |
| Physical:   | Maintain adequate seal at restoration-tooth margin<br>Thermal expansion coefficient similar to tooth structure<br>Potential for adhesion to enamel and dentin |
| Mechanical: | Stable under extremes of age and environment                                                                                                                  |
| Chemical:   | Sufficient early strength, hardness, and rigidity to resist occlusal forces (6-24 months)<br>Releases therapeutic amounts of fluoride and is rechargeable     |

TABLE II  
MATERIALS, CLASSIFICATION, MANUFACTURERS, AND BATCH NUMBERS

| Material                                | Classification                        | Code | Manufacturer                       | Batch numbers                        |
|-----------------------------------------|---------------------------------------|------|------------------------------------|--------------------------------------|
| Vitremer                                | Resin-modified glass ionomer          | RMGI | 3M Dental<br>(St. Paul, Minnesota) | 19930622<br>19930424<br>19941222     |
| Fuji II LC                              | Resin-modified glass ionomer          | RMGI | GC Corp.<br>(Tokyo, Japan)         | 041034<br>081132<br>150734<br>180523 |
| Fuji IX                                 | High-viscosity modified glass ionomer | MGI  | GC Corp.<br>(Tokyo, Japan)         | 081251<br>260451                     |
| Fuji II                                 | Glass ionomer restorative material    | GI   | GC Corp.<br>(Tokyo, Japan)         | 931209C<br>940202A<br>940302A        |
| Intermediate Restorative Material (IRM) | Polymer-modified zinc oxide-eugenol   | ZOE  | Caulk<br>(Milford, Delaware)       | 931006<br>931217<br>930514           |

mold at  $37 \pm 2^\circ\text{C}$  and  $95 \pm 5\%$  humidity and after 24 hours in a distilled water bath at  $37 \pm 2^\circ\text{C}$ .

Rigidity (elastic modulus) (GPa) was calculated as the ratio of stress to strain along the straight-line portion of the 24-hour compressive strength graph.

Diametral tensile strength (MPa) at 1 and 24 hours was determined according to specification number 96 using a cylindrical mold ( $3 \times 6$  mm) and a crosshead speed of 1 mm per minute.

Working and setting times (seconds) for the self-cured materials were determined using an oscillating rheometer (Sabri Enterprises, Lombard, Illinois) at  $37^\circ\text{C}$ .<sup>25</sup>

Hardness (Knoop hardness number) at 1 and 24 hours was determined (Tukon model 300, Wilson Instruments, Binghamton, Massachusetts) using the diametral specimens and a 600-g load.

In vitro bond strength to enamel (MPa) was determined using human enamel specimens prepared to 600 grit. Bonding of each material was accomplished using a cylindrical mold 3.75 mm in diameter. After setting for 1 hour in the mold at  $37 \pm 2^\circ\text{C}$  and  $95 \pm 5\%$  relative humidity and thermocycling for 500 cycles at 5 and  $55^\circ\text{C}$ , specimens were immediately tested in shear on the universal testing machine at 1 mm per minute. One RMGI (Vitremer) was tested both with and without the "primer" (poly (acrylic acid)/hydroxyethyl methacrylate copolymer) that comes with the kit. The other RMGI (Fuji II LC) was bonded without a "conditioner," although the manufacturer recommended its use, because a separate product was not included in the kit.

Comparative storage stability (shelf life) was determined by subjecting the material liquids to temperatures of  $50^\circ\text{C}$  for prolonged periods (U.S. Army Dental Research Detachment Shelf

Life Study, unpublished data). Viscosity (centipoise [cp] at  $27^\circ\text{C}$ ) was measured (model DV-II, Brookfield Engineering, Inc., Stoughton, Massachusetts) at baseline and at intervals until it passed an arbitrary 2,000 cp, which is two to four times baseline for the polymer-based materials.

Statistical analysis included two-way and one-way analysis of variance (ANOVA), Scheffe's test ( $p \leq 0.05$ ) for multiple comparisons, and Kruskal-Wallis and Mann-Whitney pairwise comparisons for nonparametric data. Sample size was eight for each mechanical test, five for working and setting times, six for bond strength tests, and three for each viscosity interval.

## Results

Results are summarized in Table III; graphic representation of statistical multiple comparisons is given in Table IV. Two-way ANOVA revealed a significant difference between materials ( $p \leq 0.0001$ ) and times ( $p \leq 0.0001$ ) for ultimate compressive strength, a significant difference between materials ( $p \leq 0.0001$ ) and times ( $p \leq 0.0001$ ) for hardness, a significant difference between varnished and unvarnished hardness samples ( $p \leq 0.0001$ ), and a significant difference for material rigidity ( $p \leq 0.0001$ ). Compressive strengths at 1 and 24 hours, rigidity at 24 hours, and hardness at 1 and 24 hours seemed to follow the same general trend:  $\text{MGI} > \text{GI} > \text{RMGI} > \text{ZOE}$ . When the RMGIs were self-cured only, the strength and hardness were often close to those of samples that had the advantage of a light-cure. Varnish did not necessarily improve or maintain microhardness after 24 hours of water exposure.

For diametral tensile strength, two-way ANOVA revealed a

TABLE III  
RESULTS, MEANS (SD)

| Material    | Property             |                   |                  |                   |                                |                 |                   |                                             |                              |                              |
|-------------|----------------------|-------------------|------------------|-------------------|--------------------------------|-----------------|-------------------|---------------------------------------------|------------------------------|------------------------------|
|             | Compressive Strength |                   | Tensile Strength |                   | Rigidity at<br>24 hrs<br>(GPa) | Hardness        |                   | Bond Strength<br>Enamel<br>(MPa)<br>(range) | Working<br>Time<br>(seconds) | Setting<br>Time<br>(seconds) |
|             | 1 hour<br>(MPa)      | 24 hours<br>(MPa) | 1 hour<br>(MPa)  | 24 hours<br>(MPa) |                                | 1 hour<br>(KHN) | 24 hours<br>(KHN) |                                             |                              |                              |
| Vitremer    |                      |                   |                  |                   |                                |                 |                   |                                             |                              |                              |
| Light-cured |                      |                   |                  |                   |                                |                 |                   | 4.4 (1.7)                                   | 3.2-8.5                      |                              |
| No gloss    | 62.6 (15.2)          | 101.1 (13.0)      | 27.8 (4.6)       | 32.2 (6.8)        | 2.09 (0.29)                    | 25.0 (5.5)      | 38.6 (5.9)        |                                             |                              |                              |
| Glossed     |                      |                   |                  | 38.8 (9.7)        |                                |                 | 29.0 (4.2)        |                                             |                              |                              |
| No primer   |                      |                   |                  |                   |                                |                 |                   | 1.8 (1.2)                                   | 0.3-4.2                      |                              |
| Self-cured  |                      |                   |                  |                   |                                |                 |                   | 4.4 (1.3)                                   | 4.0-7.8                      | 115 (15) 200 (28)            |
| No gloss    | 54.0 (12.6)          | 86.3 (12.7)       | 23.3 (3.8)       | 33.5 (3.2)        | 2.21 (0.21)                    | 20.3 (2.7)      | 30.4 (6.0)        |                                             |                              |                              |
| Fuji II LC  |                      |                   |                  |                   |                                |                 |                   |                                             |                              |                              |
| Light-cured |                      |                   |                  |                   |                                |                 |                   | 1.0 (1.2)                                   | 0-3.5                        |                              |
| No varnish  | 92.8 (8.1)           | 113.5 (8.2)       | 26.7 (5.7)       | 22.6 (6.7)        | 2.44 (0.25)                    | 31.0 (1.9)      | 27.2 (4.2)        |                                             |                              |                              |
| Varnished   |                      |                   |                  | 32.3 (5.4)        |                                |                 | 19.9 (4.5)        |                                             |                              |                              |
| Self-cured  |                      |                   |                  |                   |                                |                 |                   | 0.1 (0.2)                                   | 0-0.6                        | 126 (9) 289 (27)             |
| No varnish  | 92.6 (11.3)          | 127.6 (13.4)      | 19.5 (3.8)       | 21.1 (4.2)        | 2.34 (0.91)                    | 33.3 (2.3)      | 30.3 (6.1)        |                                             |                              |                              |
| Varnished   |                      |                   |                  | 27.0 (5.1)        |                                |                 | 22.2 (4.7)        |                                             |                              |                              |
| Fuji IX     |                      |                   |                  |                   |                                |                 |                   | 1.9 (1.5)                                   | 0.6-4.9                      | 97 (7) 145 (8)               |
| No varnish  | 137.4 (22.9)         | 139.9 (18.8)      | 16.1 (4.7)       | 15.4 (4.9)        | 3.53 (0.20)                    | 51.4 (7.3)      | 57.1 (10.9)       |                                             |                              |                              |
| Varnished   |                      |                   |                  | 21.2 (3.1)        |                                |                 | 58.4 (13.3)       |                                             |                              |                              |
| Fuji II     |                      |                   |                  |                   |                                |                 |                   | 2.2 (0.9)                                   | 0.9-4.2                      | 93 (9) 160 (25)              |
| No varnish  | 112.6 (27.0)         | 142.0 (35.1)      | 16.1 (4.5)       | 7.7 (1.6)         | 2.80 (0.55)                    | 33.0 (7.5)      | 42.2 (8.3)        |                                             |                              |                              |
| Varnished   |                      |                   |                  | 17.1 (3.7)        |                                |                 | 34.3 (3.2)        |                                             |                              |                              |
| IRM         | 50.3 (10.0)          | 55.7 (12.5)       | 7.9 (1.4)        | 8.5 (2.1)         | 1.19 (0.28)                    | 11.3 (2.8)      | 14.9 (2.6)        | 0                                           |                              | 105 (24) 237 (27)            |

significant difference between materials ( $p \leq 0.0001$ ) but not between times ( $p \leq 0.49$ ). Tensile strength at 1 and 24 hours did not follow the same trend as compressive strength/hardness/rigidity, but was as follows: RMGI > MGI > GI > ZOE. One RMGI (Vitremer) appeared to be superior or equal to the other RMGI (Fuji II LC) in tension but not in compression. For the RMGIs, varnish or gloss allowed tensile strength to increase over 24 hours after water exposure, whether the material was light-cured or self-cured only. Even without varnish protection, the RMGI had greater tensile strength than the MGI or the GI. Varnish was critical to maintaining or improving tensile strength after water exposure for both GI and MGI. ANOVA revealed significant differences between material working times ( $p = 0.04$ ) and setting times ( $p = 0.0001$ ).

Statistical analysis for bond strength data was nonparametric, because data were not normally distributed, and revealed a significant difference between materials ( $p = 0.0001$ ). Bond strengths for MGI and GI were typical for traditional GI to untreated enamel; light-cured bond strength and self-cured bond strength for one RMGI (Vitremer) were typical for traditional GI when a surface conditioner is used.<sup>16,26</sup> Without conditioner, the bond strength of one RMGI (Vitremer) decreased to the level of the bond strength of the MGI and GI. Light-curing was necessary to achieve any degree of bond strength for the other RMGI (Fuji II LC).

Baseline viscosity ranged from 400 to 800 cp for new, polymer-based liquids and was approximately 8 cp for ZOE. Accelerated aging results were variable even for different batches of the same material; one batch of RMGI (Vitremer) measured greater than 2,000 cp at baseline within the manufacturer's designated shelf life. Overall, the viscosity of the two RMGIs exceeded 2,000 cp at approximately 30 to 35 days of exposure at

50°C; the GI passed that point at 40 days, whereas the viscosity of MGI remained less than 2,000 cp past 60 days. The viscosity of ZOE liquid remained at the baseline level past 80 days.

### Discussion

The MGI and GI generally exhibited greater compressive strength, hardness, and rigidity at 1 hour than the RMGIs despite the purported faster set of the RMGIs. Conversely, the tensile strength of the RMGIs is markedly superior to that of GI and MGI, with or without varnish application. The difference may be attributable to the resin component of the RMGI, and, because brittle materials characteristically fracture in tension,<sup>27</sup> this may be a critical advantage of the RMGIs. The RMGI samples that were self-cured reached only approximately 80% or more of the mechanical properties of the light-cured samples. This implies that these materials may be used successfully as temporary restorative materials even if no light-curing capability is available in the field.

Varnish and/or gloss application was essential to improve or maintain tensile strength for the GIs and MGIs after water exposure. This may obviate the use of the conventional GIs in the field. The resin component of the RMGI apparently allows superior resistance to moisture degradation of tensile strength. Curiously, varnish application does not necessarily improve or maintain hardness after 23 hours of water exposure. This may be a function of the test method; application of a surface coating may impede accurate determination of bulk microhardness by surface indentation.

Although wear is a complex combination of mechanical, compositional, and physical properties,<sup>28-30</sup> data indicate that both

Downloaded from https://academic.oup.com/milmed/article/163/6/381/4831910 by guest on 23 April 2024

TABLE IV

MULTIPLE COMPARISONS (THOSE MATERIALS NOT STATISTICALLY DIFFERENT [ $P < 0.05$ ] WITHIN EACH TEST GROUP ARE JOINED BY SOLID LINES)

| Compressive Strength (1 hour) | Compressive Strength (24 hours) |
|-------------------------------|---------------------------------|
| Fuji IX                       | Fuji II                         |
| Fuji II                       | Fuji IX                         |
| Fuji II LC (LC)               | Fuji II LC (CC)                 |
| Fuji II LC (CC)               | Fuji II LC (LC)                 |
| Vitremer (LC)                 | Vitremer (LC)                   |
| Vitremer (CC)                 | Vitremer (CC)                   |
| IRM                           | IRM                             |
| Hardness (1 hour)             | Hardness (24 hours)             |
| Fuji IX                       | Fuji IX                         |
| Fuji II                       | Fuji II                         |
| Fuji II LC (CC)               | Vitremer (LC)                   |
| Fuji II LC (LC)               | Vitremer (CC)                   |
| Vitremer (LC)                 | Fuji II LC (CC)                 |
| Vitremer (CC)                 | Fuji II LC (LC)                 |
| IRM                           | IRM                             |
| Tensile Strength (1 hour)     | Tensile Strength (24 hours)     |
| Vitremer (LC)                 | Vitremer (CC)                   |
| Fuji II LC (LC)               | Vitremer (LC)                   |
| Vitremer (CC)                 | Fuji II LC (LC)                 |
| Fuji II LC (CC)               | Fuji II LC (CC)                 |
| Fuji II                       | Fuji IX                         |
| Fuji IX                       | IRM                             |
| IRM                           | Fuji II                         |
| Rigidity                      | Bond Strength                   |
| Fuji IX                       | Vitremer (LC)                   |
| Fuji II                       | Vitremer (CC)                   |
| Fuji II LC (LC)               | Fuji II                         |
| Fuji II LC (CC)               | Fuji IX                         |
| Vitremer (CC)                 | Fuji II LC (LC)                 |
| Vitremer (LC)                 | Fuji II LC (CC)                 |
| IRM                           | IRM                             |
| Working Time                  | Setting Time                    |
| Fuji II LC (CC)               | Fuji II LC (CC)                 |
| Vitremer (CC)                 | IRM                             |
| IRM                           | Vitremer (CC)                   |
| Fuji IX                       | Fuji II                         |
| Fuji II                       | Fuji IX                         |

MGI and RMGI are mechanically superior to the currently used ZOE's and should be more than adequate for temporary restorations.

Bond strength to enamel is relevant to restoration retention, and seal at the restoration-tooth interface is essential to even temporary clinical success. Although bond strengths were typical for traditional GI to untreated and treated enamel,<sup>16,26</sup> bond strength of the RMGI to enamel were lower than that reported in other laboratory studies.<sup>22</sup> This may be attributable to tooth-surface preparation and means of polymerization tested in this study. Although a conditioner or primer and a light source may improve bond strength, such material may not be available in the military field situation. The use of the glass ionomer-based material liquid (a weak acid) to remove pellicle and smear layer may be a practical alternative in an austere field environment.<sup>31</sup>

The MGI liquid resisted an increase in viscosity under accel-

erated aging conditions far better than the other polymer-based materials tested. Batch variation was an important factor with some materials, and the light-sensitive materials (RMGI) would be expected to be more storage-labile than the solely self-cured materials (GI and MGI).

Data revealed differences between the two RMGIs (Vitremer and Fuji II LC). Compressive strength and rigidity favored Fuji II LC; tensile and bond strength favored Vitremer; and moisture affected hardness and tensile strength of Fuji II LC more than Vitremer. Possible explanations for these differences are the resin/glass ionomer ratio and the monomer compositions in each product. There were also differences between the two glass ionomer materials. The high-viscosity modified glass ionomer (Fuji IX) was stronger, more rigid, harder, and not as affected by moisture contamination or extreme temperatures as the conventional glass ionomer (Fuji II). These differences are likely attributable to the compositional differences mentioned above and imply critical advantages for the MGI as a temporary restorative material.

Previous research has addressed two additional properties that may be critical to the success of temporary restorations. Fluoride release from MGIs and RMGIs is reportedly comparable with that from conventional GIs.<sup>32</sup> For RMGI, release is similar whether light-cured or self-cured only,<sup>33</sup> and all the glass ionomer-based materials can be recharged.<sup>34</sup> Research has also shown that thermal expansion of GI and MGI is matched to tooth structure<sup>35</sup> and that adding resin to the material (RMGI) raises expansion considerably.<sup>24</sup>

Temporary restorative materials may not be used at such quantities that even a comparatively high cost would prohibit military purchase. Nevertheless, cost is not trivial; the cost of GI is approximately two times the cost of ZOE, that of MGI is approximately five times that of ZOE, and that of RMGI is approximately six to nine times that of ZOE. Complex packaging (i.e., capsules) will double the cost.

Packaging for delivery in the military field environment is another critical issue. A self-mixing cartridge and pistol, or disposable individual squeeze packs with pad and sticks, could be easily handled in any field situation and would guarantee proper and consistent powder/liquid ratios. Such packaging should also solve most storage and stability problems for light- or air-sensitive materials.

## Conclusions

When all mechanical, physical, chemical, handling, and cost factors are considered, the high-viscosity modified glass ionomer materials may prove to be the most suitable temporary restorative material for military field use.

## References

1. Deutsch WM, Simecek JW: Dental emergencies among Marines ashore in Operations Desert Shield/Storm. *Milit Med* 1996; 161: 620-3.
2. Payne TF, Posey WR: Analysis of dental casualties in prolonged field training exercises. *Milit Med* 1981; 146: 269-71.
3. Tewles RB, King JE: Impact of troop dental health in combat readiness. *Milit Med* 1987; 152: 233-5.
4. Moody HL: Logistic Research and Development Program Needs. FT Sam Houston.

TX, USA Academy of Health Sciences, October 23, 1990.

5. Eikenberg S, Meyer R: Using the modified dental aid bag. *Medical Department Journal* 1996; PB 8-96-9/10: 21-6.
6. Jenderson MD, Phillips RW, Schwartz ML, et al: A comparative study of four zinc oxide and eugenol formulations as restorative materials. Part I. *J Prosthet Dent* 1969; 21: 176-83.
7. Jenderson MD, Phillips RW: A comparative study of four zinc oxide and eugenol formulations as restorative materials. Part II. *J Prosthet Dent* 1969; 21: 300-9.
8. Hume WR: The pharmacologic and toxicological properties of zinc oxide-eugenol. *J Am Dent Assoc* 1986; 113: 789-91.
9. Meeker HG, Najafi MM, Linke HAB: Germicidal properties of dental cavity liners, bases and cements. *Gen Dent* 1986; 34: 472-8.
10. Mesu FP, Reedijk T: Degradation of luting cements measured in vitro and in vivo. *J Dent Res* 1983; 62: 1236-40.
11. O'Brien WJ: *Dental Materials: Properties and Selection*, p 527. Chicago, IL, Quintessence, 1989.
12. Powers JM, Craig RG: A review of the composition and properties of endodontic filling materials. *J Mich Dent Assoc* 1979; 61: 523-31.
13. Craig RJ, ed: *Restorative Dental Materials*, Ed 10, p 177. St. Louis, MO, Mosby, 1997.
14. Batchelor RF, Wilson AD: Zinc oxide-eugenol cements. I. The effect of atmospheric conditions on rheological properties. *J Dent Res* 1969; 48: 883-7.
15. Kielbassa AM, Attin T, Hellwig E: Diffusion behavior of eugenol from zinc oxide-eugenol mixtures through human and bovine dentin in vitro. *Operative Dentistry* 1997; 22: 15-20.
16. Hotz P, McLean JW, Sced I, et al: The bonding of glass ionomer cements to metal and tooth substrates. *Br Dent J* 1977; 142: 41-7.
17. Forsten L: Short- and long-term release from glass ionomers and other fluoride-containing filling materials in vitro. *Scand Dent J* 1990; 98: 179-85.
18. Anusavice KJ, ed: *Phillip's Science of Dental Materials*, Ed 10, p 533. Philadelphia, PA, Saunders, 1996.
19. Mount GJ: Glass ionomer cements: past, present and future. *Operative Dentistry* 1994; 19: 82-90.
20. Johnson GH, Herbert AH, Powers JM: Changes in properties of glass-ionomer cements with time. *Operative Dentistry* 1988; 13: 191-6.

21. Graf A, Sindel J, Kramer N, et al: Wear and cyclic fatigue of new glass ionomer cements (abstract 2427). *J Dent Res* 1997; 76(special issue): 317.
22. Sa CF, Pascotto C, Pieroli DA, et al: Shear bond strength of three glass ionomer cements to enamel and dentin (abstract 2407). *J Dent Res* 1997; 76(special issue): 314.
23. Mitra SB: Adhesion to dentin and physical properties of a light cured glass ionomer liner/base. *J Dent Res* 1991; 70: 72-4.
24. Burgess J, Norling B, Summitt J: Resin ionomer restorative materials: the new generation. *J Esthetic Dent* 1994; 6(5): 207-15.
25. Cook WD, Brockhurst P: The oscillating rheometer: what does it measure? *J Dent Res* 1980; 59: 795-9.
26. Powis DR, Folleras T, Merson SA, et al: Improved adhesion of a glass ionomer cement to dentin and enamel. *J Dent Res* 1982; 61: 1416-22.
27. Craig RJ, ed: *Restorative Dental Materials*, Ed 10, pp 69-70. St. Louis, MO, Mosby, 1997.
28. Ferracane JL: What are the appropriate uses of posterior composites? Presented at the NIH Symposium on Esthetic Restorative Materials, Bethesda, MD, June 9, 1991.
29. Soderholm K-JM: Wear of composites: a solved problem? Presented at the Annual Meeting of the American Association of Dental Research, San Antonio, TX, March 9, 1995.
30. Bayne SC, Taylor DF, Heymann HO: Protection hypothesis for composite wear. *Dent Mater* 1992; 8: 305-9.
31. Peutzfeldt A: Compomers and glass ionomers: bond strength to dentin and mechanical properties. *Am J Dent* 1996; 9: 259-63.
32. Mather E, Walls AWG, McCabe JF: The physical properties of a glass ionomer cement used for ART (abstract 476). *J Dent Res* 1995; 74(divisional abstracts): 881.
33. Mitra SB: In vitro fluoride release from a light-cured glass ionomer. *J Dent Res* 1991; 70: 75-8.
34. Tenuta LMA, Pascotto RC, Navarro MFL, et al: Effect of fluoridated gel and solution on fluoride uptake by glass ionomer cements (abstract 2434). *J Dent Res* 1997; 76(special issue): 318.
35. Craig RJ, ed: *Restorative Dental Materials*, Ed 10, p 45. St. Louis, MO, Mosby, 1997.

Downloaded from https://academic.oup.com/nlmed/article/163/6/381/4831910 by guest on 23 April 2024

## Special AMSUS Discount Offer!



Get essential military or federal news important to your career and support AMSUS. Army Times Publishing Company will provide the up-to-date news and remit \$5.00 of the subscription price to AMSUS.

*Army Times, Navy Times, Air Force Times or Federal Times* for only 89¢ an issue!

Up to 55% off the cover price!

**Call Toll-Free 1-800-368-5718 or return the adjoining order form**

**YES!** I want to support AMSUS. Please send me a 30 week subscription for just \$26.70 to the paper I've selected below, and send \$5.00 of my payment to AMSUS.

Army Times   
  Navy Times   
  Air Force Times   
  Federal Times

Regular Edition  
 Marine Corps Edition\*

Rank \_\_\_\_\_ Name \_\_\_\_\_

Address \_\_\_\_\_

City/State/Zip \_\_\_\_\_

Telephone (\_\_\_\_) \_\_\_\_\_

Charge my:   
  Visa   
  MasterCard   
  American Express   
  Discover

Acct. # \_\_\_\_\_ Exp. Date \_\_\_\_\_

Signature \_\_\_\_\_

Check enclosed   
  Bill me   
  This is a renewal   
 HD6UC1 N

Mail to: Army Times Publishing Company  
Customer Service Department  
Springfield, VA 22159

\*Available to Most APO/FPO addresses  
Military papers cover price is \$2.25  
Federal Times cover price is \$2.00
